# Supplementary material for: IBtkα Activates the β-Catenin-Dependent Transcription of MYC through Ubiquitylation and Proteasomal Degradation of GSK3β in Cancerous B Cells
Source: MDPI journal article supplement (doi:10.3390/ijms23042044), 2022-02-12
Supplement: s1 [file s1]

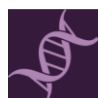

Supplementary materials

# IBtk $\alpha$ Activates the $\beta$ -Catenin-Dependent Transcription of MYC through Ubiquitylation and Proteasomal Degradation of GSK3 $\beta$ in Cancerous B Cells

Eleonora Vecchio <sup>1,\*</sup>, Nancy Nisticò <sup>1</sup>, Gaetanina Golino <sup>1</sup>, Enrico Iaccino <sup>1</sup>, Domenico Maisano <sup>1</sup>, Selena Mimmi <sup>1</sup>, Annamaria Aloisio <sup>1</sup>, Maurizio Renna <sup>2</sup>, Angelica Avagliano <sup>3</sup>, Alessandro Arcucci <sup>3</sup>, Giuseppe Fiume <sup>1,\*</sup>,<sup>†</sup> and Ileana Quinto <sup>1,†</sup>

<sup>1</sup> Department of Experimental and Clinical Medicine, University of Catanzaro 'Magna Graecia', 88100 Catanzaro, Italy; nancynistico@unicz.it (N.N.); tania.golino@gmail.com (G.G.); iaccino@unicz.it (E.I.); maisano@unicz.it (D.M.); mimmi@unicz.it (S.M.); aloisio@unicz.it (A.A.); quinto@unicz.it (I.Q.)

<sup>2</sup> Department of Molecular Medicine and Medical Biotechnology, University of Naples Federico II, 80131 Naples, Italy; maurizio.renna@unina.it (M.R.)

<sup>3</sup> Department of Public Health, University of Naples Federico II, 80131 Naples, Italy; angelica.avagliano@unina.it (A.A.); alessandro.arcucci2@unina.it (A.A.)

\* Correspondence: eleonoravecchio@unicz.it (E.V.); fiume@unicz.it (G.F.)

† G.F. and I.Q. should be considered as co-last authors.

**Table S1.** Mass spectrometry-based identification of GSK3 $\beta$  from the IBtk $\alpha$  co-immunoprecipitation experiment. HEK293T cells were transfected with pCMV6-IBtk $\alpha$ -FLAG plasmid or the corresponding empty vector (24  $\mu$ g of DNA/100-mm dish). Protein extracts (1,5 mg) were immunoprecipitated with anti-FLAG antibody (20  $\mu$ g), and the immunocomplexes were resolved by NuPAGE 4–12% SDS-PAGE. Gels were stained with colloidal Coomassie, and protein bands were excised for in-gel tryptic digestion. Chromatography of tryptic peptides and mass spectrometry were performed as previously described [8].

| Accession no. | Description                         | Coverage | Unique Peptides |
|---------------|-------------------------------------|----------|-----------------|
| Q9P2D0        | Inhibitor of Bruton tyrosine kinase | 60.16    | 110             |
| P49841        | Glycogen synthase kinase-3 beta     | 7.88     | 2               |
